# Supplementary material
Source: Springer Nature journal article supplement (https://www.springermedizin.de/resource/supplementary/12889_2013_5991_MOESM2_ESM.pdf/9494116)

Adjusted Odds Ratio

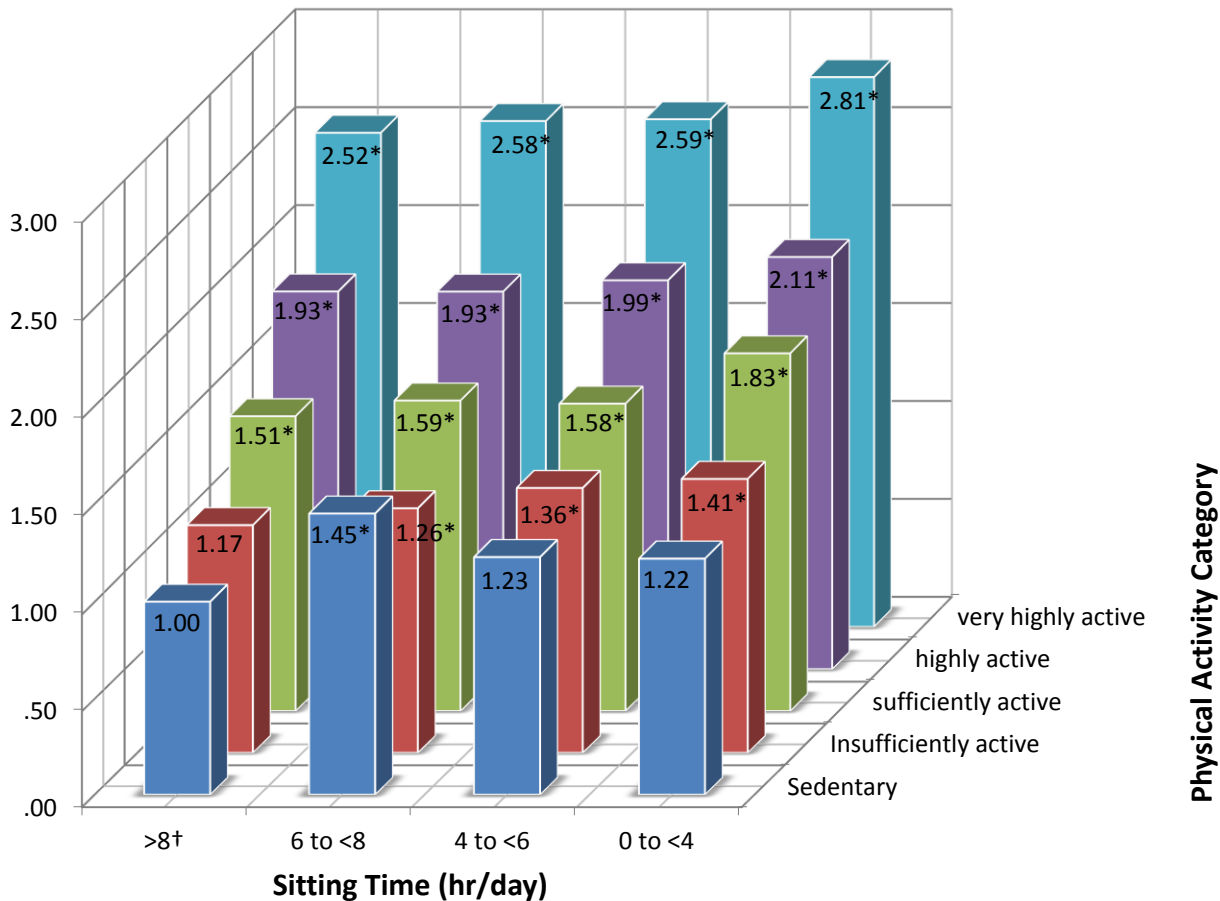

Physical Activity Category

Supplement: MOESM2 [file 9494116]
